# Supplementary material for: In situ self-assembled N-rich carbon on pristine graphene as a highly effective support and cocatalyst of short Pt nanoparticle chains for superior electrocatalytic activity toward methanol oxidation
Source: Royal Society of Chemistry journal article supplement (doi:10.1039/d1nr05988b), 2021-01-01
Supplement: d1nr05988b1.pdf [file d1nr05988b1.pdf]

## Electronic Supplementary Information

### *In situ* self-assembled N-rich carbon on pristine graphene as a highly effective support and cocatalyst of Pt nanoparticles for superior catalytic activity toward methanol oxidation

Xiuling Fan,<sup>ab</sup> Ming Zhao,<sup>c</sup> Tianhao Li,<sup>c</sup> Lian Ying Zhang,<sup>d</sup> Maoxiang Jing,<sup>e</sup> Weiyong Yuan<sup>\*ab</sup> and Chang Ming Li<sup>c</sup>

<sup>a</sup> Ningbo Research Institute, Zhejiang University, Ningbo 315100, China

<sup>b</sup> College of Chemical and Biological Engineering, Zhejiang University, Hangzhou 310027, China

<sup>c</sup> Institute for Clean energy and Advanced Materials, College of Materials & Energy, Southwest University, Chongqing 400715, China

<sup>d</sup> Institute of Materials for Energy and Environment, College of Materials Science and Engineering, Qingdao University, Qingdao 266071, China

<sup>e</sup> Institute for Advanced Materials, Jiangsu University, Zhenjiang 212013, China

\*Corresponding author. E-mail address: wyyuan@zju.edu.cn

#### Contents

Size distribution of Pt NPs in G@NC@Pt (Fig. S1).

Size distribution of Pt NPs in G@NC@Pt (2:5) (Fig. S2).

Detailed comparison of G@NC@Pt with state-of-the-art commercial Pt/C catalysts and representative noncovalently functionalized carbon supported Pt (Table S1).

CV curves of G@NC@Pt (2:3) and commercial Pt/C after measuring CV for 1000 cycles, and initial CV curve of G@NC@Pt (2:3) and those after 500 and 1000 cycles of the ADT tests in 1 M CH<sub>3</sub>OH + 0.5 M H<sub>2</sub>SO<sub>4</sub> (Fig. S3).

CV curves of G@NC@Pt with different Pt loadings (Fig. S4).

Chronoamperometric curves of G@NC@Pt with 20% and 40% loadings and the remaining percentage of peak current for G@NC@Pt with 20% and 40% loadings after measuring CV for different numbers of cycles (Fig. S5).

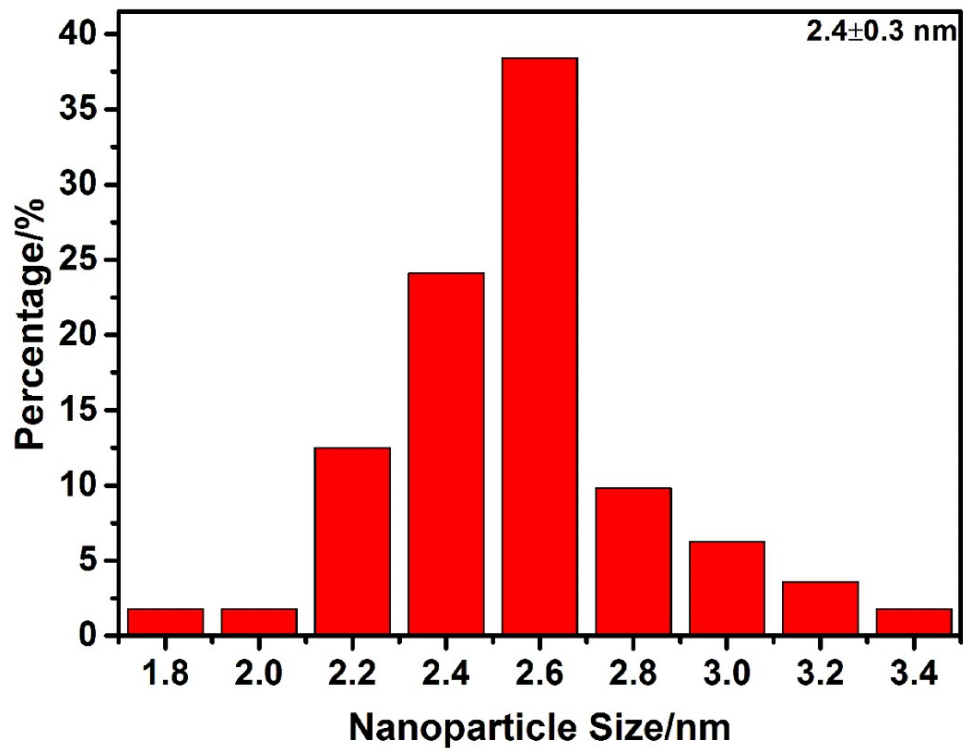

Fig. S1 Size distribution of Pt NPs in G@NC@Pt.

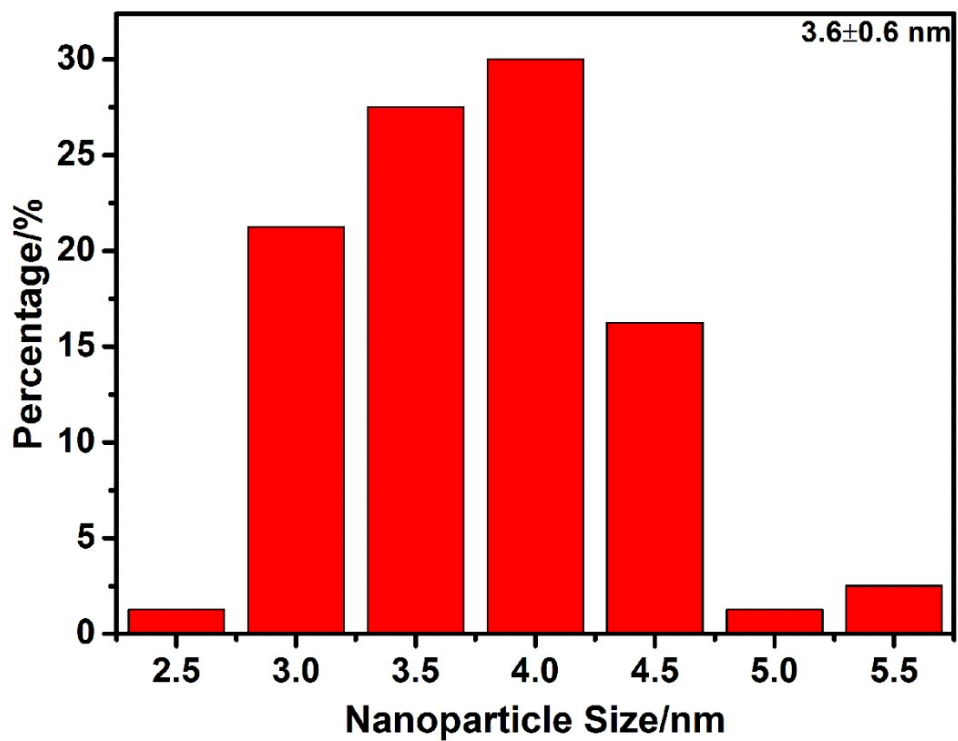

Fig. S2 Size distribution of Pt NPs in G@NC@Pt (2:5).

**Table S1** Detailed comparison of G@NC@Pt with state-of-the-art commercial Pt/C

| Catalyst                                                 | Forward peak current density ( $\text{A mg}^{-1} \text{Pt}$ ) | Onset potential (V)       | Scan rate ( $\text{mV s}^{-1}$ ) | Electrolyte                   | Ref.      |
|----------------------------------------------------------|---------------------------------------------------------------|---------------------------|----------------------------------|-------------------------------|-----------|
| Commercial Pt/C (20%, JM)                                | 0.354                                                         | $\sim 0.58$ (vs. RHE)     | 50                               | 0.5 M $\text{H}_2\text{SO}_4$ | 1         |
| commercial Pt/C (20%, Alfa Aesar)                        | 0.212                                                         | $\sim 0.2$ (vs. SCE)      | 50                               | 0.5 M $\text{H}_2\text{SO}_4$ | 2         |
| Commercial Pt/C (20%, JM)                                | 0.1845                                                        | $\sim 0.38$ (vs. SCE)     | 50                               | 1.0 M $\text{H}_2\text{SO}_4$ | 3         |
| Commercial Pt/C (20%, JM)                                | 0.295                                                         | 0.26 (vs. Ag/AgCl)        | 50                               | 0.5 M $\text{H}_2\text{SO}_4$ | 4         |
| Commercial Pt/C (20%, JM)                                | $\sim 0.202$                                                  | $\sim 0.25$ (vs. SCE)     | 20                               | 0.5 M $\text{H}_2\text{SO}_4$ | 5         |
| Commercial Pt/C (20%, E-TEK)                             | $\sim 0.105$                                                  | $\sim 0.4$ (vs. Ag/AgCl)  | 50                               | 0.5 M $\text{H}_2\text{SO}_4$ | 6         |
| Pt-TiO <sub>2</sub> -rNHGO                               | 0.591                                                         | $\sim 0.30$ (vs. Ag/AgCl) | 50                               | 0.5 M $\text{H}_2\text{SO}_4$ | 7         |
| Pt@RFC                                                   | 0.657                                                         | 0.36 (vs. SCE)            | 50                               | 0.5 M $\text{H}_2\text{SO}_4$ | 8         |
| Pt/NCNTs-500                                             | 0.80                                                          | 0.23 (vs. SCE)            | 20                               | 0.5 M $\text{H}_2\text{SO}_4$ | 9         |
| PMo/Pt/MWCNT                                             | 0.1647                                                        | 0.2 (vs. Ag/AgCl)         | 50                               | 1.0 M $\text{H}_2\text{SO}_4$ | 10        |
| Pt/TiO <sub>2</sub> @NC-NCNTs                            | 0.577                                                         | $\sim 0.27$ (vs. SCE)     | 50                               | 0.5 M $\text{H}_2\text{SO}_4$ | 11        |
| Pt/G-NCNTs                                               | 0.74                                                          | $\sim 0.45$ (vs. RHE)     | 50                               | 0.5 M $\text{H}_2\text{SO}_4$ | 12        |
| Pt-PVP-GNF                                               | $\sim 0.235$                                                  | 0.55 (vs. NHE)            | 20                               | 0.5 M $\text{H}_2\text{SO}_4$ | 13        |
| Pt/e-RGO-SWCNT                                           | 0.192                                                         | $\sim 0.45$ (vs. SCE)     | 50                               | 0.5 M $\text{H}_2\text{SO}_4$ | 14        |
| Pt/PANI-HPMo-GS                                          | 0.322                                                         | 0.2 (vs. SCE)             | 20                               | 0.5 M $\text{H}_2\text{SO}_4$ | 15        |
| Pt-RGO/PF                                                | 0.404                                                         | $\sim 0.23$ (vs. SCE)     | 50                               | 0.5 M $\text{H}_2\text{SO}_4$ | 16        |
| Pt-CQD/RGO                                               | 0.529                                                         | $\sim 0.25$ (vs. SCE)     | 50                               | 0.5 M $\text{H}_2\text{SO}_4$ | 17        |
| Pt/(LDCNT) <sub>3</sub> -(NG) <sub>7</sub>               | 0.872                                                         | $\sim 0.20$ (vs. SCE)     | 50                               | 0.5 M $\text{H}_2\text{SO}_4$ | 18        |
| Pt/G <sub>5</sub> -(PCNT) <sub>5</sub>                   | 0.618                                                         | $\sim 0.25$ (vs. SCE)     | 20                               | 1 M $\text{H}_2\text{SO}_4$   | 19        |
| Pt/CNTs@TiCoN                                            | 0.92                                                          | $\sim 0.32$ (vs. Ag/AgCl) | 50                               | 0.5 M $\text{H}_2\text{SO}_4$ | 20        |
| Pt/Ti <sub>0.5</sub> Cr <sub>0.5</sub> N <sub>2</sub> /G | 0.785                                                         | 0.46 (vs. RHE)            | 50                               | 0.5 M $\text{H}_2\text{SO}_4$ | 21        |
| G-Cys-Au@Pt                                              | 0.674                                                         | 0.23 (vs. SCE)            | 50                               | 0.1 M $\text{H}_2\text{SO}_4$ | 22        |
| G@NC@Pt                                                  | 0.961                                                         | 0.20 (vs. SCE)            | 50                               | 0.5 M $\text{H}_2\text{SO}_4$ | This work |

catalysts and representative noncovalently functionalized carbon supported Pt catalysts.

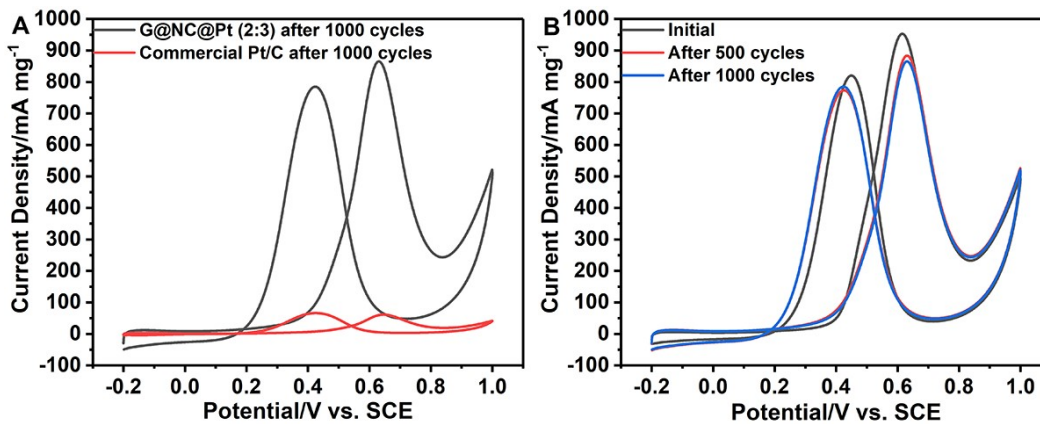

**Fig. S3** (A) CV curves of G@NC@Pt (2:3) and commercial Pt/C after measuring CV for 1000 cycles in 1 M  $\text{CH}_3\text{OH}$  + 0.5 M  $\text{H}_2\text{SO}_4$ . (B) Initial CV curve of G@NC@Pt (2:3) and those after 500 and 1000 cycles of the ADT tests carried out in 1 M  $\text{CH}_3\text{OH}$  + 0.5 M  $\text{H}_2\text{SO}_4$ .

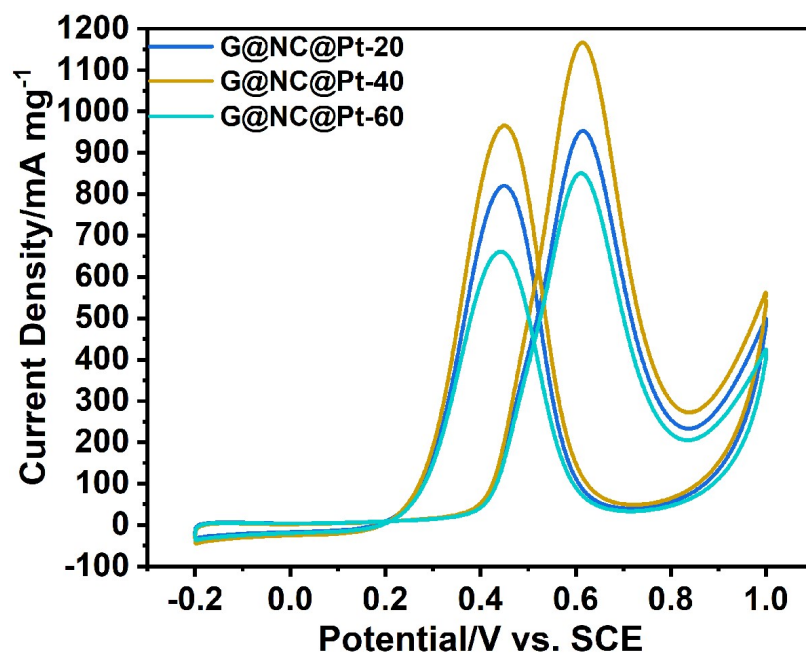

**Fig. S4** CV curves of G@NC@Pt with different Pt loadings.

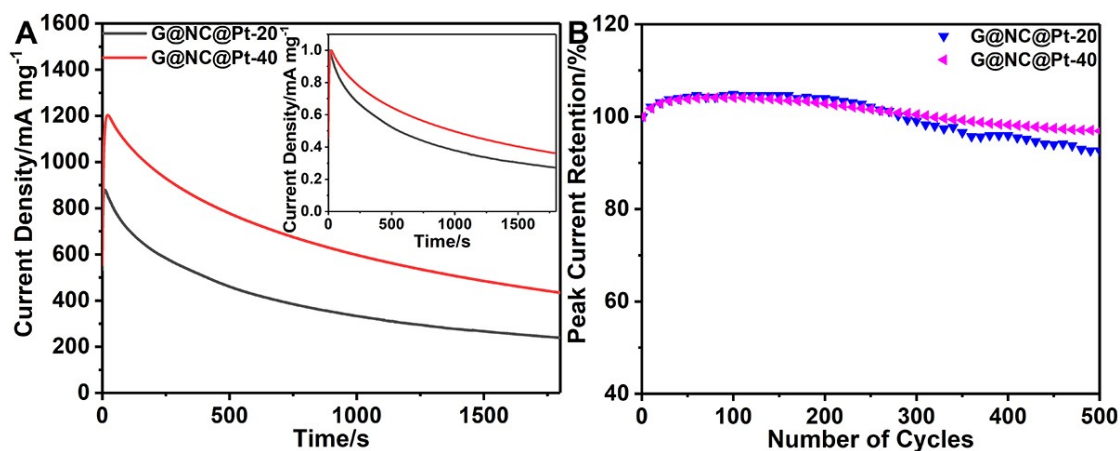

**Fig. S5** (A) Chronoamperometric curves of G@NC@Pt with 20% and 40% loadings. (B) The remaining percentage of peak current for G@NC@Pt with 20% and 40% loadings after measuring CV for different numbers of cycles. The inset of (A) shows the normalized current density versus time curves obtained from the chronoamperometric curves.

## References

1. J. Cao, M. Guo, J. Wu, J. Xu, W. Wang and Z. Chen, *J. Power Sources*, 2015, **277**, 155-160.
2. R.-X. Wang, J.-J. Fan, Y.-J. Fan, J.-P. Zhong, L. Wang, S.-G. Sun and X.-C. Shen, *Nanoscale*, 2014, **6**, 14999-15007.
3. H. Yan, C. Tian, L. Sun, B. Wang, L. Wang, J. Yin, A. Wu and H. Fu, *Energy Environ. Sci.*, 2014, **7**, 1939-1949.
4. Y. Li, L. Zhang, Z. Hu and J. C. Yu, *Nanoscale*, 2015, **7**, 10896-10902.
5. G. Zhang, C. Huang, R. Qin, Z. Shao, D. An, W. Zhang and Y. Wang, *J. Mater. Chem. A*, 2015, **3**, 5204-5211.
6. S. Guo, S. Dong and E. Wang, *Chem. Commun.*, 2010, **46**, 1869-1871.
7. R. Cui, S. Liu, X. Guo, H. Huang, J. Wang, B. Liu, Y. Li, D. Zhao, J. Dong and B. Sun, *ACS Appl. Energy Mater.*, 2020, **3**, 2665-2673.
8. K. Li, Z. Jin, J. Ge, C. Liu and W. Xing, *J. Mater. Chem. A*, 2017, **5**, 19857-19865.
9. W. Shi, K.-H. Wu, J. Xu, Q. Zhang, B. Zhang and D. S. Su, *Chem. Mater.*, 2017, **29**, 8670-8678.
10. X. Jin, B. He, J. Miao, J. yuan, Q. Zhang and L. Niu, *Carbon*, 2012, **50**, 3083-3091.
11. M. Jin, S.-Y. Lu, X. Zhong, H. Liu, H. Liu, M. Gan and L. Ma, *ACS Sustainable Chem. Eng.*, 2020, **8**, 1933-1942.
12. L.-M. Zhang, X.-L. Sui, L. Zhao, G.-S. Huang, D.-M. Gu and Z.-B. Wang, *Carbon*, 2017, **121**, 518-526.
13. Y. L. Hsin, K. C. Hwang and C.-T. Yeh, *J. Am. Chem. Soc.*, 2007, **129**, 9999-10010.
14. Q. Zhang, F. Yue, L. Xu, C. Yao, R. D. Priestley and S. Hou, *Appl. Catal., B*, 2019, **257**, 117886.
15. Z. Cui, C. X. Guo and C. M. Li, *J. Mater. Chem. A*, 2013, **1**, 6687-6692.
16. Q. Xue, J.-K. Li and Z.-Y. Yang, *Langmuir*, 2017, **33**, 872-880.
17. T.-Z. Hong, Q. Xue, Z.-Y. Yang and Y.-P. Dong, *J. Power Sources*, 2016, **303**, 109-117.
18. M. Yan, Q. Jiang, T. Zhang, J. Wang, L. Yang, Z. Lu, H. He, Y. Fu, X. Wang and H. Huang, *J. Mater. Chem. A*, 2018, **6**, 18165-18172.
19. X. Zhang, J. Zhang, H. Huang, Q. Jiang and Y. Wu, *Electrochim. Acta*, 2017, **258**, 919-926.
20. G. Zhan, Z. Fu, D. Sun, Z. Pan, C. Xiao, S. Wu, C. Chen, G. Hu and Z. Wei, *J. Power Sources*, 2016, **326**, 84-92.
21. B. Liu, L. Huo, R. Si, J. Liu and J. Zhang, *ACS Appl. Mater. Interfaces*, 2016, **8**, 18770-18787.
22. N. Seselj, C. Engelbrekt, Y. Ding, H. A. Hjuler, J. Ulstrup and J. Zhang, *Adv. Energy Mater.*, 2018, **8**, 1702609.
